# Supplementary material for: Coordination polymer nanocombs self-assembled at the water–chloroform interface
Source: Royal Society of Chemistry journal article supplement (doi:10.1039/b701839h), 2007-01-01
Supplement: b701839h.pdf [file b701839h.pdf]

## Coordination Polymer Nanocombs Self-Assembled at the Water-Chloroform Interface

Bing Liu,<sup>a</sup> Meng Chen,<sup>a</sup> Chikashi Nakamura,<sup>b</sup> Jun Miyake<sup>b</sup> and Dong-Jin Qian,<sup>\*a</sup>

<sup>a</sup> Department of Chemistry, Fudan University, 220 Handan Road, Shanghai 200433, P.

R. China. Fax: +86 21 5566 4192; Tel: +86 21 6564 3666; E-mail:

*djqian@fudan.edu.cn*

<sup>b</sup> Research Institute of Cell Engineering, National Institute of Advanced Industrial Science and Technology (AIST), Amagasaki 661-0974, Hyogo, Japan.

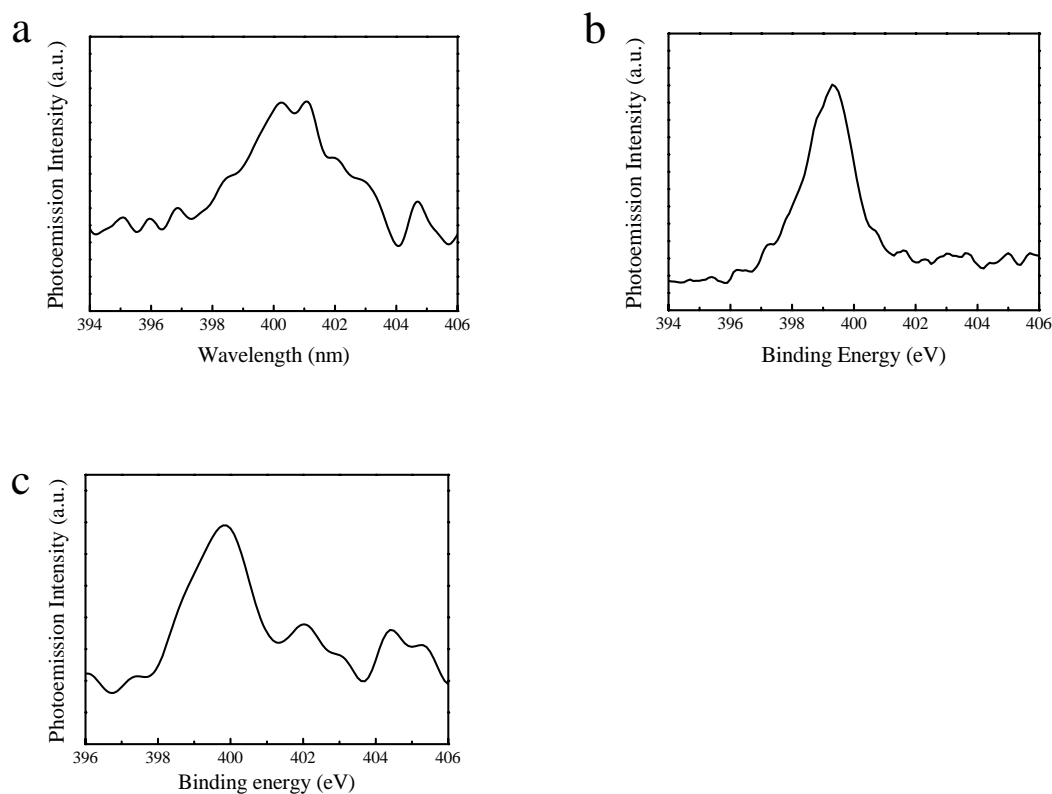

**Fig. S1** X-Ray photoelectron spectroscopy (XPS) pattern for the N1s peak of (a) HgTPyP/HgBPy nanocomb films on quartz substrate, (b) TPyP powders, and (c) BPy powders.

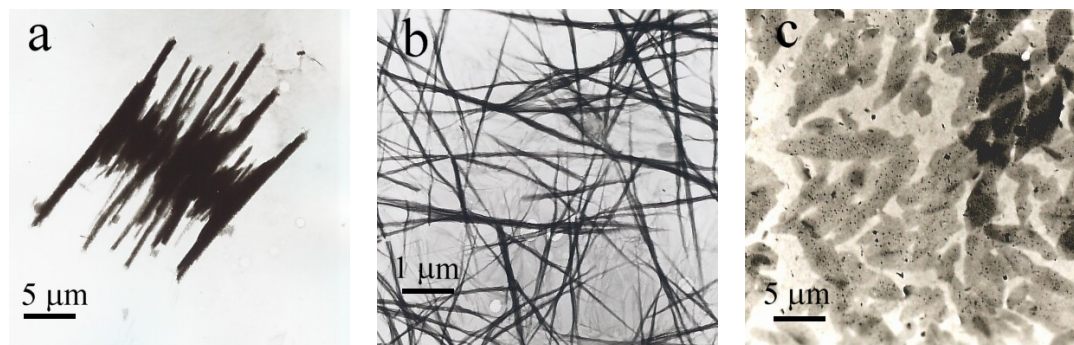

**Fig. S2** Transmission electron microscopy (TEM) images of (a) HgTPyP/HgBPy nanocomb, (b) HgTPyP nanowires, and (c) HgBPy nanorods.
